# Supplementary material
Source: publisher figshare collection journal article supplement (https://sage.figshare.com/ndownloader/files/15253625)
Supplement: Supplementary file 1 [file 15253625]

Supplemental Table. Primer sets for semi-quantitative PCR

| Category | Gene name | Sense (5’ → 3’) | Antisense (5’ → 3’) |
| --- | --- | --- | --- |
| M1-related | *Tnfa* | CCTGTAGCCCACGTCGTAGC | AGCAATGACTCCAAAGTAGACC |
|  | *Il12* | CAGAAGCTAACCATCTCCTGGTTTG | TCCGGAGTAATTTGGTGCTTCACAC |
| M2-related | *Il10* | CTATGCTGCCTGCTCTTACTG | GATGGCCTTGTAGACACCTTGG |
|  | *Alox15* | CAGCTGGATTGGTTCTACTG | CTCTGAACTTCTTCAGCACAG |
|  | *Fizz1* | CCCAGTGAATACTGATGAGACCATAGA | CCTCTTCATTCTTAGGACAGTTGGC |
|  | *Ym1* | GGGCATACCTTTATCCTGAG | CCACTGAAGTCATCCATGTC |
|  | *Arg1* | CAGAAGAATGGAAGAGTCAG | CAGATATGCAGGGAGTCACC |
| House-keeping | *Beta-actin* | TGGAATCCTGTGGCATCCATGAAAC | TAAAACGCAGCTCAGTAACAGTCCG |
